# Supplementary material for: Dynamic Modeling of the Angiogenic Switch and Its Inhibition by Bevacizumab
Source: Hindawi journal article supplement (doi:10.1155/2019/9079104), 2019-01-01
Supplement: f1 [file 9079104.f1.zip]

Archive with 10 entries (9 files):
- 9079104.f1/
- 9079104.f1/f_gamma.m
- 9079104.f1/f_P_MMAGS.m
- 9079104.f1/inj_fnc_prot_1_discrete.m
- 9079104.f1/inj_fnc_prot_2_discrete.m
- 9079104.f1/MMAGS_ode_2_0.m
- 9079104.f1/MMAGS_ode_2_1.m
- 9079104.f1/MMAGS_ode_2_2.m
- 9079104.f1/simulate_MMAGS_ode_2.m
- 9079104.f1/sim_tumor_dynamics_MMAGS_4.m
