# Supplementary material for: Dynamic Modeling of the Angiogenic Switch and Its Inhibition by Bevacizumab
Source: Hindawi journal article supplement (doi:10.1155/2019/9079104), 2019-01-01
Supplement: f1 [file 9079104.f1.zip › 9079104.f1/f_P_MMAGS.m]

function [out] = f_P_MMAGS(V_tot)

V=V_tot;

    r=(3/4*V/pi)^(1/3);
    if r<=0.15
        V_core=0;
    else
        V_core=4/3*(r-0.15)^3*pi;
    end
    V_perif=V-V_core;

    out=V_perif/V_core;

end
