# Supplementary material for: Dynamic Modeling of the Angiogenic Switch and Its Inhibition by Bevacizumab
Source: Hindawi journal article supplement (doi:10.1155/2019/9079104), 2019-01-01
Supplement: f1 [file 9079104.f1.zip › 9079104.f1/inj_fnc_prot_1_discrete.m]

function y=inj_fnc_prot_1_discrete(t)

T_W=0.4;

if t>3 & t<3+T_W
    y=0.171/T_W;
else
    y=0;
end
    
